# Supplementary material for: Investigation of Host Candidate Malaria-Associated Risk/Protective SNPs in a Brazilian Amazonian Population
Source: PLoS One. 2012 May 16;7(5):e36692. doi: 10.1371/journal.pone.0036692 (PMC3353949; doi:10.1371/journal.pone.0036692)
Supplement: Table S1 — List of all polymorphisms genotyped in this study. (XLS) [file pone.0036692.s001.xls]

## Sheet: Plan1
Table S1: List of all polymorphisms genotyped in this study
rs number	Alternative name**	gene	Chr	ancestral/reference	derived
				allele	allele
rs7537937		GBP7	1	G	C
rs2814778	Duffy FyA/FyB	DARC	1	T	C
rs3024500		IL10	1	G	A
rs1800896	IL10-1082	IL10	1	T	C
rs1800890	IL10-3533	IL10	1	A	T
rs17047660	McC(McCoy)	CR1	1	A	G
rs17047661	SI (Swain-Lanley)	CR1	1	A	G
rs17411697		IL1A	2	G	T
rs1143634	IL1B A2	IL1B	2	G	A
rs708567	IL17RE	IL17RE	3	C	T
rs187084	TLR9	TLR9	3	G	A
rs6780995	IL17RD	IL17RD	3	G	A
rs4833095		TLR1	4	C	T
rs5743611		TLR1	4	C	G
rs5743810		TLR6	4	G	T
rs5743809*		TLR6	4	A	G
rs1801033		C6	5	T	G
rs2706384		IRF1	5	G	T
rs20541*		IL13	5	G	A
rs2243250	IL4 -589	IL4	5	C	T
rs2239704	LTA+77	LTA	6	C	A
rs909253	LTA NcoI	LTA	6	A	G
rs1799964	TNFa-1031	TNF	6	T	C
rs1800750	TNF-376	TNF	6	G	A
rs1800629	TNF-308	TNF	6	G	A
rs361525	TNF-238	TNF	6	G	A
rs3093662	TNF+851	TNF	6	A	G
rs2242665	CTL4	CTL4	6	C	T
rs1555498		IL20RA	6	C	T
rs2075820		NOD1	7	C	T
rs3211938	CD36 T1264G	CD36	7	T	G
None assigned	CD36 G1439C*	CD36	7	G	C
rs17140229		CFTR	7	T	C
rs4986790		TLR4	9	A	G
rs4986791		TLR4	9	C	T
rs8176746		ABO	9	G	T
rs33950507*	HbE	HBB	11	C	Del
rs334	HbS	HBB	11	T	A
rs7935564*		TRIM5	11	G	A
rs542998		RTN3	11	T	C
rs2227507*		IL22	12	T	C
rs1012356		IL22	12	A	T
rs2227491		IL22	12	T	C
rs2227485		IL22	12	G	A
rs2227478		IL22	12	G	A
rs229587		SPTB	14	T	C
rs2230739		ADCY9	16	T	C
rs10775349		ADCY9	16	C	G
rs1805015		IL4R	16	T	C
rs2535611		ADORA2B	17	C	T
rs2297518		NOS2	17	G	C
rs12720463*	NOS2A-954 (or-969)	NOS2	17	C	G
rs9282799*	NOS2A -1173	NOS2	17	G	A
rs8078340	NOS2A -1659	NOS2	17	G	A
rs373533		EMR1	19	C	A
rs461645		EMR1	19	A	G
rs1799969	ICAM1 codon241	ICAM1	19	G	A
rs5498	ICAM1 codon469	ICAM1	19	A	G
rs8386*	GNAS	GNAS	20	C	T
rs3177244	DERL3	DERL3	22	G	A
rs3092945	CD40LG-727	CD40LG	X	T	C
rs1126535	CD40LG+220	CD40LG	X	T	C
rs1050829	G6PD+376	G6PD	X	T	C
rs1050828	G6PD+202	G6PD	X	C	T
All SNPs are referred to dbSNP132 and Ensemble build 63 and genome build GRCh37.5. * SNPs removed from analysis because they had
either a minor allele frequency less than 1% or due to high rates of missing genotype calls.**Alternative name from the literature or from
laboratory usage.
