# Supplementary material for: Investigation of Host Candidate Malaria-Associated Risk/Protective SNPs in a Brazilian Amazonian Population
Source: PLoS One. 2012 May 16;7(5):e36692. doi: 10.1371/journal.pone.0036692 (PMC3353949; doi:10.1371/journal.pone.0036692)
Supplement: Table S2 — X chromosome analysis. (XLS) [file pone.0036692.s002.xls]

## Sheet: Plan1
Table S2: X chromosome analysis
Comparision		Gender	SNP	Ancestral/	Derived	Minor	MAF	MAF	OR	LCL	UCL	p-value
groups				Reference allele	allele	allele	Controls	Cases
Any_malaria	Never_malaria	Female	rs3092945	T	C	C	0.039	0.044	1137	0.448	2885	0.787
		Male	rs3092945	T	C	C	0.000	0.027	16535	0.033	8361710	0.377
		Overall	rs3092945	T	C	C	0.028	0.035	1205	0.480	3027	0.691
		Female	rs1126535	T	C	T	0.299	0.283	0.926	0.620	1383	0.708
		Male	rs1126535	T	C	T	0.133	0.285	2593	1202	5593	0.015
		Overall	rs1126535	T	C	T	0.252	0.284	1154	0.809	1647	0.429
		Female	rs1050829	T	C	C	0.026	0.049	1930	0.657	5669	0.232
		Male	rs1050829	T	C	C	0.069	0.034	0.476	0.156	1459	0.194
		Overall	rs1050829	T	C	C	0.038	0.041	0.984	0.453	2140	0.968
		Female	rs1050828	C	T	T	0.006	0.032	5111	0.670	39019	0.116
		Male	rs1050828	C	T	T	0.000	0.011	6566	0.013	3419632	0.555
		Overall	rs1050828	C	T	T	0.005	0.021	5235	0.758	36179	0.093
Asymptomatic	Never_malaria	Female	rs3092945	T	C	C	0.039	0.036	0.931	0.256	3380	0.913
		Male	rs3092945	T	C	C	0.000	0.069	44444	0.086	22900212	0.234
		Overall	rs3092945	T	C	C	0.028	0.053	1090	0.308	3855	0.893
		Female	rs1126535	T	C	T	0.299	0.309	1050	0.617	1787	0.856
		Male	rs1126535	T	C	T	0.133	0.250	2167	0.911	5154	0.080
		Overall	rs1126535	T	C	T	0.252	0.279	1280	0.814	2014	0.285
		Female	rs1050829	T	C	C	0.026	0.058	2296	0.632	8345	0.207
		Male	rs1050829	T	C	C	0.069	0.080	1174	0.338	4083	0.801
		Overall	rs1050829	T	C	C	0.038	0.069	1623	0.662	3977	0.290
		Female	rs1050828	C	T	T	0.006	0.048	7727	0.889	67132	0.064
		Male	rs1050828	C	T	T	0.000	0.038	22745	0.042	12181632	0.330
		Overall	rs1050828	C	T	T	0.005	0.043	8663	1122	66908	0.038
clinical_malaria	Never_malaria	Female	rs3092945	T	C	C	0.039	0.047	1203	0.462	3137	0.705
		Male	rs3092945	T	C	C	0.000	0.015	9000	0.017	4687310	0.491
		Overall	rs3092945	T	C	C	0.028	0.029	1260	0.489	3249	0.632
		Female	rs1126535	T	C	T	0.299	0.275	0.889	0.585	1350	0.580
		Male	rs1126535	T	C	T	0.133	0.294	2708	1249	5874	0.012
		Overall	rs1126535	T	C	T	0.252	0.285	1143	0.791	1651	0.477
		Female	rs1050829	T	C	C	0.026	0.046	1827	0.604	5520	0.286
		Male	rs1050829	T	C	C	0.069	0.023	0.323	0.098	1066	0.063
		Overall	rs1050829	T	C	C	0.038	0.034	0.821	0.365	1847	0.633
		Female	rs1050828	C	T	T	0.006	0.028	4371	0.555	34450	0.161
		Male	rs1050828	C	T	T	0.000	0.005	2710	0.005	1562584	0.759
		Overall	rs1050828	C	T	T	0.005	0.015	4177	0.586	29754	0.154
clinical_malaria	Asymptomatic	Female	rs3092945	T	C	C	0.036	0.047	1293	0.423	3951	0.652
		Male	rs3092945	T	C	C	0.069	0.015	0.203	0.069	0.596	0.004
		Overall	rs3092945	T	C	C	0.053	0.029	0.496	0.228	1077	0.076
		Female	rs1126535	T	C	T	0.309	0.275	0.846	0.530	1351	0.484
		Male	rs1126535	T	C	T	0.250	0.294	1250	0.764	2045	0.374
		Overall	rs1126535	T	C	T	0.279	0.285	1018	0.725	1430	0.916
		Female	rs1050829	T	C	C	0.058	0.046	0.796	0.305	2072	0.640
		Male	rs1050829	T	C	C	0.080	0.023	0.275	0.106	0.716	0.008
		Overall	rs1050829	T	C	C	0.069	0.034	0.468	0.238	0.920	0.028
		Female	rs1050828	C	T	T	0.048	0.028	0.566	0.189	1694	0.309
		Male	rs1050828	C	T	T	0.038	0.005	0.119	0.022	0.660	0.015
		Overall	rs1050828	C	T	T	0.043	0.015	0.359	0.143	0.905	0.030
Any_malaria group consisted of: clinical malaria, asymptomatic infection and previous history of malaria; Asymptomatic group: asymptomatic infection, clinical_Malaria group: current and previous mild malaria,
Never_malaria group: no history of previous malaria. MAF: minor allele frequency; p-value; OR = odds ratio, 95% Confidence interval (LCL, UCL).
