# Supplementary material for: Investigation of Host Candidate Malaria-Associated Risk/Protective SNPs in a Brazilian Amazonian Population
Source: PLoS One. 2012 May 16;7(5):e36692. doi: 10.1371/journal.pone.0036692 (PMC3353949; doi:10.1371/journal.pone.0036692)
Supplement: Table S3 — Allele frequencies differences between Santa Isabel do Rio Negro and Barcelos. (XLS) [file pone.0036692.s003.xls]

## Sheet: location_af.txt
Table S3 : Allele frequency differences between Santa Isabel do Rio Negro and Barcelos
	Santa Isabel do Rio Negro (N)		Santa Isabel do Rio Negro (MAF)
SNPID		Barcelos (N)		Barcelos (MAF)	Fst
rs1012356	50	618	0.5	0.46683	0.000305911
rs1050829	53	627	0.009	0.045	0.002
rs1050828	53	624	0.009	0.018	0
rs10775349	51	612	0.28431	0.2835	2.29318e-07
rs1126535	53	614	0.151	0.289	0.007
rs1143634	53	603	0.0283	0.07131	0.00217259
rs12720463	53	600	0	0.01083	0.000887839
rs1555498	52	619	0.03846	0.07108	0.00119135
rs17047660	53	615	0.01887	0.03008	0.000323916
rs17047661	50	616	0.02	0.08279	0.00380339
rs17140229	53	612	0.03774	0.02533	0.000440799
rs17411697	53	622	0.27358	0.24196	0.000391686
rs1799964	52	619	0.16346	0.18417	0.000205465
rs1799969	52	604	0.31731	0.22682	0.00333425
rs1800629	53	619	0.00943	0.03231	0.00128593
rs1800750	49	601	0.0102	0.03411	0.00127456
rs1800890	52	633	0.07692	0.11611	0.0010738
rs1800896	53	631	0.07547	0.14422	0.00282489
rs1801033	52	611	0.49038	0.42553	0.00123977
rs1805015	49	606	0.07143	0.13861	0.00269888
rs187084	50	613	0.41	0.46982	0.00100289
rs20541	52	518	0.29808	0.37838	0.00229068
rs2075820	53	618	0.06604	0.0979	0.000855802
rs2227478	50	631	0.22	0.29319	0.00177788
rs2227485	52	615	0.50962	0.47642	0.000317489
rs2227491	51	607	0.47059	0.46129	2.48798e-05
rs2227507	52	615	0	0.00163	0.000127268
rs2230739	51	620	0.2549	0.30161	0.000732374
rs2239704	52	609	0.22115	0.27504	0.00106595
rs2242665	53	615	0.27358	0.40569	0.00533381
rs2243250	53	604	0.33019	0.42136	0.00254089
rs229587	51	614	0.32353	0.28257	0.000582122
rs2297518	50	611	0.07	0.08347	0.000167694
rs2535611	51	626	0.02941	0.04872	0.000576789
rs2706384	52	590	0.34615	0.37881	0.000338353
rs2814778	52	609	0.01923	0.10837	0.00632296
rs3024500	51	624	0.07843	0.15385	0.00314812
rs3092945	53	615	0.003	0.032	0.006
rs3093662	51	620	0.04902	0.06613	0.00033912
rs3177244	52	614	0.06731	0.11401	0.00159889
rs3211938	50	623	0	0.02247	0.00170485
rs334	50	624	0	0.01763	0.00132956
rs33950507	53	623	0	0	0
rs361525	52	636	0.05769	0.05031	7.88182e-05
rs373533	53	599	0.18868	0.24207	0.00117472
rs461645	51	606	0.17647	0.2434	0.00176752
rs4833095	50	594	0.48	0.4537	0.000199697
rs4986790	43	598	0	0.02425	0.00166441
rs4986791	53	630	0	0.01667	0.00131377
rs542998	51	603	0.03922	0.1335	0.00579767
rs5498	49	597	0.54082	0.46985	0.00141573
rs5743611	52	613	0.01923	0.02365	6.18683e-05
rs5743809	52	609	0	0.00328	0.000258815
rs5743810	52	606	0.08654	0.07426	0.000157759
rs6780995	51	605	0.52941	0.4876	0.000501515
rs708567	52	598	0.28846	0.31605	0.000260163
rs7537937	51	615	0.15686	0.24553	0.00305909
rs7935564	53	519	0.36792	0.35838	3.32395e-05
rs8078340	53	612	0.14151	0.17484	0.000571648
rs8176746	53	608	0	0.03043	0.00251018
rs8386	51	628	0.0098	0.01035	2.05974e-06
rs909253	51	594	0.40196	0.48737	0.00212798
rs9282799	52	631	0	0.00317	0.000242056
SNPID: SNP identification; MAF: minor allele frequency; fixation index (FST)
