# Supplementary material for: Investigation of Host Candidate Malaria-Associated Risk/Protective SNPs in a Brazilian Amazonian Population
Source: PLoS One. 2012 May 16;7(5):e36692. doi: 10.1371/journal.pone.0036692 (PMC3353949; doi:10.1371/journal.pone.0036692)
Supplement: Table S4 — Allele frequencies and test of association - Any_malaria versus never_malaria group. (XLS) [file pone.0036692.s004.xls]

## Sheet: Plan1
Table S4: Allele frequencies and test of association – Any_malaria versus never_malaria group
SNPID	ancestral/reference allele	derived allele	Minor allele	missingness	never_allelefreq	never_hwe_p	any_allelefreq	add_p	add_OR	add_OR_LCL	add_OR_UCL	dom_p	dom_OR	dom_OR_LCL	dom_OR_UCL	rec_p	rec_OR	rec_OR_LCL	rec_OR_UCL	het_p	het_OR	het_OR_LCL	het_OR_UCL	gen_p	gen_OR_major allele	gen_OR_minor allele	gen_OR_major allele_LCL	gen_OR_major allele_UCL	gen_OR_minor allele_LCL	gen_OR_minor allele_UCL
rs2814778	T	C	C	0.070988	0.10648	0.43288	0.09818	0.46405	0.82689	0.50091	1365	0.59416	0.85758	0.4897	15018	0.35652	0.43428	0.082872	22758	0.79061	0.92386	0.51636	1653	0.62209	0.91002	0.50779	16309	0.42726	0.081288	22457
rs3024500	G	A	G	0.044753	0.20721	0.47576	0.13976	0.010085	0.59851	0.40819	0.87757	0.014009	0.55167	0.34551	0.88083	0.13652	0.44307	0.15935	12319	0.057638	0.61978	0.38121	10076	0.036094	0.58416	0.35695	0.956	0.37806	0.13421	10649
rs1800896	T	C	C	0.035494	0.21171	0.56001	0.12743	0.0013594	0.528	0.36025	0.77387	0.0011732	0.45335	0.28338	0.72528	0.1378	0.44162	0.15725	12403	0.0063451	0.49941	0.30649	0.81377	0.0045862	0.47045	0.28691	0.77141	0.35799	0.12575	10191
rs1800890	A	T	T	0.033951	0.16667	0.046236	0.10291	0.010935	0.57746	0.38261	0.87155	0.029993	0.56626	0.34258	0.93599	0.034925	0.28506	0.093383	0.87015	0.17582	0.68552	0.40089	11722	0.032179	0.64494	0.37561	11074	0.2594	0.084333	0.7979
rs17047660	A	G	G	0.061728	0.01818	0.846	0.03012	0.4876	14145	0.50651	39502	0.58172	13487	0.45026	40398	0.34124	909090	0	Inf	0.72987	12111	0.40007	36663	0.59686	12179	0.40234	36865	916970	0	Inf
rs17047661	A	G	G	0.063272	0.07944	0.66768	0.073	0.59457	0.86258	0.50456	14747	0.41228	0.76525	0.40815	14348	0.58379	17352	0.21082	14282	0.28707	0.69579	0.36241	13359	0.50122	0.70159	0.36519	13479	16561	0.20079	13.66
rs7537937	G	C	C	0.064815	0.28182	0.19738	0.22984	0.11938	0.76046	0.54075	10695	0.018112	0.5803	0.36941	0.91158	0.51216	13454	0.54043	33494	0.0054323	0.52099	0.32999	0.82253	0.020943	0.52239	0.32664	0.83544	10231	0.40045	26141
rs33950507	C	DEL	DEL	0.050926	0	NaN	0	NA	NA	NA	NA	NA	NA	NA	NA	NA	NA	NA	NA	NA	NA	NA	NA	NA	NA	NA	NA	NA	NA	NA
rs334	T	A	A	0.050926	0.01389	0.88363	0.01677	0.96078	10326	0.28639	37231	0.96078	10326	0.28639	37231	NA	NA	NA	NA	0.96078	10326	0.28639	37231	0.96078	10326	0.28639	37231	NA	NA	NA
rs7935564	G	A	A	0.20525	0.39352	0.020996	0.35135	0.18517	0.78828	0.55481	1.12	0.042052	0.59966	0.36293	0.99082	0.75029	11274	0.53519	23749	0.029614	0.59161	0.36725	0.95301	0.081969	0.56116	0.33367	0.94375	0.80375	0.35629	18132
rs542998	T	C	T	0.08179	0.14679	0.78976	0.1142	0.038565	0.61676	0.39454	0.96414	0.024936	0.55178	0.33155	0.91832	0.76678	0.77951	0.15569	3903	0.02727	0.54874	0.32588	0.92402	0.078377	0.54306	0.32181	0.91643	0.67038	0.13281	33838
rs2227507	T	C	C	0.064815	0	NaN	0.00202	0.56252	186010	0	Inf	0.56252	186010	0	Inf	NA	NA	NA	NA	0.56252	186010	0	Inf	0.56252	186010	0	Inf	NA	NA	NA
rs1012356	A	T	A	0.057099	0.44393	0.25387	0.47718	0.40677	11395	0.83652	15521	0.51151	1179	0.7232	1922	0.47	12178	0.70919	20913	0.98588	0.99589	0.63108	15716	0.70629	11186	0.66082	18934	13022	0.69804	24292
rs2227491	T	C	T	0.070988	0.43981	0.22468	0.46964	0.46292	1122	0.82463	15267	0.54632	11616	0.71576	18851	0.53778	11839	0.68843	20359	0.97278	1008	0.6391	15897	0.76328	11129	0.66013	18762	12607	0.67738	23465
rs2227485	G	A	G	0.058642	0.4633	0.31597	0.48403	0.63731	10766	0.79198	14635	0.7516	10837	0.65985	17798	0.63901	11332	0.66972	19174	0.90244	0.97198	0.61709	1531	0.88547	10424	0.61112	17782	11623	0.62646	21566
rs2227478	G	A	G	0.041667	0.30275	0.65301	0.28613	0.56895	0.9072	0.64979	12666	0.28611	0.78299	0.49934	12278	0.60123	12317	0.55548	27309	0.1603	0.72083	0.45741	11359	0.36837	0.72844	0.45436	11679	10698	0.46819	24447
rs229587	T	C	T	0.058642	0.35321	0.80183	0.27645	0.050443	0.71799	0.51666	0.99778	0.042904	0.62498	0.3955	0.98762	0.31608	0.69338	0.34485	13942	0.15108	0.71358	0.45107	11289	0.12201	0.64187	0.39503	1043	0.56636	0.2707	11849
rs1805015	T	C	C	0.074074	0.1381	0.41115	0.13131	0.9937	0.99815	0.62963	15824	0.70822	0.90404	0.53436	15295	0.2703	27699	0.34904	21981	0.44554	0.80984	0.47363	13847	0.43327	0.82923	0.48431	14198	26488	0.33235	21111
rs2230739	T	C	C	0.049383	0.27727	0.79606	0.30929	0.24198	12286	0.86668	17416	0.24716	13056	0.83022	20533	0.51199	12966	0.58553	28714	0.43065	12057	0.75541	19243	0.49241	12749	0.78773	20633	14363	0.63363	32556
rs10775349	C	G	C	0.069444	0.25926	0.38309	0.29091	0.29656	12046	0.84572	17156	0.25259	13066	0.82464	20702	0.68871	11751	0.52755	26177	0.3439	12601	0.7776	2042	0.51969	13079	0.79748	2145	13017	0.57292	29575
rs2535611	C	T	C	0.046296	0.05556	0.54099	0.04804	0.58804	0.8256	0.41689	1635	0.56429	0.81322	0.40672	1626	0.69182	63838	0	Inf	0.54456	0.80422	0.40169	16101	0.77037	0.80485	0.40204	16112	62782	0	Inf
rs2297518	G	A	A	0.067901	0.08491	0.33944	0.08032	0.67927	0.88038	0.48394	16016	0.64173	0.8643	0.47027	15885	0.58787	162170	0	Inf	0.60884	0.85144	0.46279	15665	0.76014	0.85335	0.46388	15698	158150	0	Inf
rs12720463	C	G	G	0.080247	0	NaN	0.01235	0.017045	4147800	0	Inf	0.017045	4147800	0	Inf	NA	NA	NA	NA	0.017045	4147800	0	Inf	0.017045	4147800	0	Inf	NA	NA	NA
rs9282799	G	A	A	0.03858	0.00901	0.9237	0.00195	0.17314	0.23291	0.030491	17791	0.17314	0.23291	0.030491	17791	NA	NA	NA	NA	0.17314	0.23291	0.030491	17791	0.17314	0.23291	0.030491	17791	NA	NA	NA
rs8078340	G	A	A	0.067901	0.2027	0.39798	0.1643	0.16863	0.75131	0.50284	11226	0.26919	0.7639	0.4755	12272	0.20319	0.46876	0.15333	1433	0.53106	0.85364	0.52181	13965	0.32762	0.81876	0.49797	13462	0.44177	0.14295	13652
rs1799969	G	A	A	0.075617	0.22477	0.78634	0.23878	0.12878	13611	0.90749	20413	0.10166	14752	0.92159	23613	0.71769	12225	0.40282	37099	0.13033	14451	0.8912	23432	0.26122	14826	0.90898	24184	14188	0.46106	43661
rs5498	A	G	G	0.084877	0.47196	0.65108	0.47428	0.65851	10746	0.78096	14786	0.87803	10401	0.62987	17176	0.55431	11812	0.67627	20632	0.72396	0.92135	0.58481	14516	0.83858	0.98673	0.58012	16783	11713	0.61052	2247
rs373533	C	A	A	0.084877	0.21101	0.62352	0.24897	0.49083	11436	0.77843	16799	0.6312	11202	0.70413	1782	0.43402	15168	0.51002	45109	0.90309	10299	0.64074	16554	0.70996	10685	0.66016	17296	15562	0.51524	47005
rs461645	A	G	A	0.075617	0.21759	0.94888	0.24847	0.62199	11004	0.75062	16133	0.61931	11244	0.70727	17876	0.82438	11187	0.41117	30436	0.68766	11022	0.68491	17738	0.88084	11178	0.68899	18134	11683	0.42218	32329
rs17411697	G	T	T	0.04784	0.20455	0.81571	0.25937	0.078312	1424	0.95201	21299	0.062066	15541	0.97244	24837	0.60531	13228	0.44375	39433	0.094054	15013	0.92618	24336	0.1754	15534	0.95278	25325	15596	0.51666	47078
rs1143634	G	A	A	0.078704	0.08559	0.15	0.06996	0.025833	0.50736	0.2857	0.90101	0.077163	0.56349	0.30378	10452	0.01265	0.043928	0.0037808	0.5104	0.22639	0.66806	0.35291	12646	0.018205	0.63717	0.33508	12116	0.03971	0.0033988	0.46394
rs8386	C	T	T	0.04321	0.00909	0.92335	0.01176	0.71125	0.73498	0.15091	35795	0.71125	0.73498	0.15091	35795	NA	NA	NA	NA	0.71125	0.73498	0.15091	35795	0.71125	0.73498	0.15091	35795	NA	NA	NA
rs3177244	G	A	A	0.064815	0.11009	0.1965	0.11871	0.65855	0.88914	0.53039	14905	0.47988	0.81822	0.47165	14194	0.18393	1805400	0	Inf	0.3413	0.76154	0.43791	13243	0.27629	0.77345	0.44481	13449	1699000	0	Inf
rs187084	G	A	G	0.064815	0.46759	0.592	0.46285	0.45199	0.88419	0.64156	12186	0.72297	0.91321	0.55165	15118	0.37199	0.78229	0.45927	13325	0.6753	11015	0.70049	17322	0.67023	0.9845	0.57501	16856	0.7746	0.41164	14576
rs6780995	G	A	A	0.078704	0.49074	0.99716	0.50102	0.81893	0.96261	0.69459	1334	0.82065	1062	0.63229	17838	0.54507	0.84947	0.50281	14351	0.47582	11796	0.749	18576	0.75299	11351	0.65373	19711	0.9241	0.48867	17475
rs708567	C	T	T	0.089506	0.31604	0.52556	0.31715	0.57496	0.90503	0.63917	12815	0.98828	0.99656	0.62923	15783	0.24194	0.64961	0.3218	13114	0.47732	11827	0.74349	18815	0.47031	10978	0.67258	17919	0.6798	0.32413	14257
rs4833095	C	T	T	0.094136	0.43056	0.68868	0.46555	0.35393	11613	0.84574	15945	0.60491	11373	0.7	18478	0.29353	13563	0.75908	24235	0.70691	0.91644	0.58161	14441	0.56857	10433	0.62305	17469	13913	0.72101	26849
rs5743611	C	G	G	0.066358	0.03604	0.69369	0.02024	0.20679	0.53615	0.2113	13604	0.20679	0.53615	0.2113	13604	NA	NA	NA	NA	0.20679	0.53615	0.2113	13604	0.20679	0.53615	0.2113	13604	NA	NA	NA
rs5743810	G	T	T	0.07716	0.07658	0.63936	0.07187	0.29676	0.73239	0.41356	1297	0.34073	0.73689	0.39775	13652	0.48942	0.40966	0.038772	43284	0.41978	0.76778	0.40838	14435	0.55731	0.76121	0.40453	14324	0.39319	0.037125	41643
rs5743809	A	G	G	0.072531	0.01351	3.04e-12	0.00102	0.014318	0.1023	0.011668	0.89696	0.028264	0.062788	0.005138	0.76729	0.025078	1.11e-07	0	Inf	0.25564	0.17135	0.0093184	31508	0.042014	0.16714	0.0090225	30961	1.09e-07	0	Inf
rs2706384	G	T	G	0.097222	0.27273	0.56996	0.39684	0.00054987	18805	12982	27239	0.0028965	20071	12688	31752	0.0095793	30333	11701	7863	0.17017	13761	0.87038	21755	0.002303	17553	10918	2822	40582	15233	10811
rs20541	G	A	G	0.20679	0.35909	0.45186	0.38614	0.51745	11143	0.802	15482	0.46451	11932	0.744	19136	0.784	10916	0.58139	20495	0.60743	11303	0.70782	18048	0.76522	11917	0.71783	19784	11973	0.60506	23691
rs2243250	C	T	C	0.075617	0.36937	0.64106	0.42111	0.16164	12566	0.91026	17346	0.36244	12393	0.78257	19625	0.13665	16163	0.83701	31211	0.82874	0.9515	0.6065	14927	0.30148	11119	0.68401	18074	17131	0.84342	34795
rs1801033	T	G	T	0.066358	0.45455	0.50653	0.42525	0.21158	0.81328	0.58808	11247	0.14872	0.69261	0.41697	11505	0.60002	0.85747	0.48511	15157	0.35801	0.80935	0.51513	12716	0.35151	0.69687	0.40941	11862	0.68098	0.34832	13313
rs1555498	C	T	C	0.052469	0.05455	0.21358	0.06746	0.78185	0.90931	0.46642	17727	0.98704	10058	0.49892	20277	0.11026	0.079807	0.0048011	13266	0.74649	11257	0.54518	23244	0.26906	1106	0.53482	22873	0.081098	0.004868	1351
rs2239704	C	A	A	0.067901	0.31193	0.039849	0.26566	0.013463	0.62305	0.42889	0.90511	0.0080152	0.53817	0.33859	0.85539	0.48452	0.70602	0.27331	18238	0.01941	0.58124	0.36828	0.91733	0.029613	0.54081	0.33651	0.86914	0.51583	0.19225	1384
rs909253	A	G	A	0.087963	0.52427	0.1909	0.46824	0.0088928	0.64338	0.46078	0.89833	0.00031498	0.34312	0.18203	0.64679	0.4663	0.81517	0.4729	14052	0.012873	0.55191	0.34385	0.88587	0.001401	0.33159	0.17231	0.63811	0.37216	0.17582	0.78776
rs1799964	T	C	C	0.054012	0.19545	0.46602	0.17495	0.39745	0.8426	0.56918	12474	0.14154	0.69839	0.43462	11222	0.25409	21835	0.49692	9594	0.047036	0.60765	0.37429	0.98651	0.092615	0.62582	0.38426	10192	1887	0.42524	83735
rs1800750	G	A	A	0.080247	0.02381	0.80264	0.03564	0.54968	1319	0.50997	34116	0.80803	11448	0.37889	34591	0.15409	876210	0	Inf	0.78005	0.84848	0.27226	26442	0.3503	0.85928	0.27583	26769	870950	0	Inf
rs1800629	G	A	A	0.055556	0.0045	0.96198	0.03493	0.023305	56041	0.76286	41168	0.024574	58059	0.7735	43579	0.46144	243810	0	Inf	0.031962	54618	0.72661	41056	0.075513	5482	0.72922	41212	256240	0	Inf
rs361525	G	A	A	0.032407	0.04955	0.58283	0.04748	0.96535	0.98376	0.47051	20569	0.86204	0.93361	0.43205	20174	0.39778	405230	0	Inf	0.75975	0.88517	0.40813	19198	0.66972	0.88918	0.40997	19285	401180	0	Inf
rs3093662	A	G	G	0.057099	0.05607	0.53889	0.0625	0.77168	11086	0.54875	22395	0.85305	10707	0.51748	22154	0.39975	402900	0	Inf	0.94538	10258	0.49456	21276	0.69919	10306	0.49687	21377	404150	0	Inf
rs2242665	C	T	T	0.060185	0.44907	0.10074	0.38323	0.0011692	0.59502	0.4341	0.81558	0.0046337	0.49281	0.29698	0.81776	0.011894	0.49293	0.28844	0.84237	0.48531	0.85056	0.54011	13394	0.0050558	0.57018	0.33154	0.98059	0.35535	0.18825	0.67077
rs17140229	T	C	C	0.066358	0.01818	0.846	0.02727	0.73124	12098	0.3998	36609	0.73124	12098	0.3998	36609	NA	NA	NA	NA	0.73124	12098	0.3998	36609	0.73124	12098	0.3998	36609	NA	NA	NA
rs2075820	C	T	T	0.058642	0.10909	0.09715	0.095	0.10286	0.65507	0.39927	10747	0.1937	0.68161	0.38675	12013	0.10112	0.24848	0.050973	12113	0.4287	0.78314	0.43126	14222	0.17612	0.7595	0.41741	13819	0.23673	0.048249	11615
rs3211938	T	G	G	0.049383	0.02294	0.8064	0.02268	0.67899	0.81546	0.31682	20989	0.51447	0.7013	0.24879	19768	0.37915	434820	0	Inf	0.38455	0.61677	0.21603	17609	0.46857	0.61947	0.21692	1769	426070	0	Inf
hCD36_G1439C	G	C	NA	0.064815	0	NaN	0	NA	NA	NA	NA	NA	NA	NA	NA	NA	NA	NA	NA	NA	NA	NA	NA	NA	NA	NA	NA	NA	NA	NA
rs4986790	A	G	G	0.10031	0.05769	0.0028534	0.01461	0.0014078	0.27372	0.12403	0.60408	0.0019342	0.223	0.089619	0.5549	0.058381	0.097933	0.008228	11656	0.011074	0.26354	0.09848	0.70524	0.0059897	0.25764	0.096211	0.68993	0.091477	0.0076817	10893
rs4986791	C	T	T	0.035494	0.01852	0.84455	0.01354	0.59508	0.73911	0.24988	21863	0.4643	0.63429	0.19524	20606	0.47248	230260	0	Inf	0.36647	0.5638	0.17088	18602	0.51577	0.56534	0.17131	18656	226430	0	Inf
rs8176746	G	T	T	0.072531	0.0367	0.69083	0.02744	0.21067	0.5753	0.25131	1317	0.18423	0.54572	0.2313	12876	0.67881	69893	0	Inf	0.16889	0.53221	0.22476	12602	0.3577	0.53302	0.22513	12619	66426	0	Inf
never: no history of malaria, Any: clinical malaria , asymptomatic infection and previous history of malaria; missingness: number of individuals with failed genotyping; alefreq: allele frequency; add: aditive model; OR: odds ratio; 95% Confidence interval (LCL, UCL); dom: dominant model; p: P-value; rec: recessive model; Het: heteroygous; gen: general model.
