# Supplementary material for: Investigation of Host Candidate Malaria-Associated Risk/Protective SNPs in a Brazilian Amazonian Population
Source: PLoS One. 2012 May 16;7(5):e36692. doi: 10.1371/journal.pone.0036692 (PMC3353949; doi:10.1371/journal.pone.0036692)
Supplement: Table S7 — Allele frequencies and test of association - Clinical_malaria versus asymptomatic group. (XLS) [file pone.0036692.s007.xls]

## Sheet: Plan1
Table S7: Allele frequencies and test of association- clinical_ malaria versus asymptomatic group
SNPID	ancestral/reference allele	derived allele	Minor allele	missingness	asym_allelefreq	asym_hwe_p	malaria_allelefreq	add_p	add_OR	add_OR_LCL	add_OR_UCL	dom_p	dom_OR	dom_OR_LCL	dom_OR_UCL	rec_p	rec_OR	rec_OR_LCL	rec_OR_UCL	het_p	het_OR	het_OR_LCL	het_OR_UCL	gen_p	gen_OR_major allele	gen_OR_minor allele	gen_OR_major allele_LCL	gen_OR_major allele_UCL	gen_OR_minor allele_LCL	gen_OR_minor allele_UCL
rs2814778	T	C	C	0.076636	0.08716	0.83594	0.1013	0.49555	11944	0.71068	20075	0.53908	11938	0.67409	2114	0.62484	16535	0.19585	13.96	0.62734	11549	0.64229	20765	0.77905	11634	0.64671	20931	16944	0.20028	14335
rs3024500	G	A	G	0.050467	0.10714	0.48048	0.14899	0.081475	14931	0.93494	23846	0.075146	15926	0.93993	26984	0.54318	15716	0.34073	72485	0.10523	15523	0.89779	2684	0.20385	15778	0.91122	27318	17344	0.37467	80292
rs1800896	T	C	C	0.039252	0.09375	0.25867	0.13682	0.057878	15747	0.96338	25741	0.046374	17224	0.98828	30018	0.6025	14817	0.31754	69137	0.060146	17092	0.9555	30576	0.13724	17323	0.96723	31024	16424	0.35098	76859
rs1800890	A	T	T	0.037383	0.07522	0.62578	0.1107	0.079621	15925	0.92228	27499	0.082338	16654	0.91566	30292	0.47515	20294	0.24558	16771	0.1171	16076	0.86812	29772	0.21273	16279	0.8785	30165	2196	0.26526	18.18
rs17047660	A	G	G	0.069159	0.02679	0.00085765	0.03109	0.80669	11107	0.47425	26011	0.64536	12599	0.46147	34398	0.62548	0.52823	0.044601	62561	0.49679	14468	0.47978	43631	0.70861	14407	0.47765	43454	0.5365	0.045258	63598
rs17047661	A	G	G	0.065421	0.09813	0.031436	0.06616	0.18011	0.70916	0.43441	11577	0.2034	0.67362	0.37108	12228	0.39684	0.52869	0.12773	21883	0.32066	0.71862	0.37903	13625	0.40721	0.70711	0.37249	13423	0.50653	0.12209	21015
rs7537937	G	C	C	0.072897	0.24091	0.3995	0.22668	0.82527	0.96213	0.68345	13544	0.8144	0.94851	0.61028	14742	0.92611	0.96152	0.42053	21984	0.84597	0.95524	0.60221	15152	0.97276	0.94943	0.59321	15195	0.94447	0.40652	21943
rs33950507	C	DEL	DEL	0.057944	0	NaN	0	NA	NA	NA	NA	NA	NA	NA	NA	NA	NA	NA	NA	NA	NA	NA	NA	NA	NA	NA	NA	NA	NA	NA
rs334	T	A	A	0.052336	0.02294	0.8064	0.01508	0.36474	0.59525	0.20093	17634	0.36474	0.59525	0.20093	17634	NA	NA	NA	NA	0.36474	0.59525	0.20093	17634	0.36474	0.59525	0.20093	17634	NA	NA	NA
rs7935564	G	A	A	0.23925	0.36364	0.11712	0.34848	0.94845	0.98742	0.67278	14492	0.59683	0.86874	0.51489	14658	0.49137	13386	0.57079	31392	0.34185	0.78117	0.46924	13005	0.59167	0.81101	0.4714	13953	11911	0.48086	29505
rs542998	T	C	T	0.091589	0.13636	0.39733	0.10771	0.3875	0.81643	0.51828	12861	0.22879	0.72819	0.43728	12126	0.43028	21768	0.26227	18068	0.1401	0.6716	0.39913	11301	0.26379	0.67973	0.4036	11448	20077	0.24106	16721
rs2227507	T	C	C	0.072897	0	NaN	0.00261	0.30154	651550	0	Inf	0.30154	651550	0	Inf	NA	NA	NA	NA	0.30154	651550	0	Inf	0.30154	651550	0	Inf	NA	NA	NA
rs1012356	A	T	A	0.057944	0.46698	0.96403	0.4799	0.60161	10825	0.80365	14581	0.9049	0.97118	0.6008	15699	0.30482	13124	0.77457	22237	0.32586	0.8039	0.52017	12424	0.51608	0.87386	0.52465	14555	12068	0.65068	22382
rs2227491	T	C	T	0.076636	0.47196	0.94869	0.46899	0.82856	10335	0.76671	13932	0.73313	0.92012	0.56931	14871	0.45577	12204	0.71893	20715	0.34598	0.81051	0.52369	12544	0.61278	0.8447	0.50702	14073	10999	0.5927	20411
rs2227485	G	A	G	0.063551	0.47706	0.75658	0.48597	0.74259	10505	0.78281	14097	0.62693	0.88774	0.5479	14384	0.28218	13237	0.78776	22244	0.17355	0.74108	0.48128	11411	0.36414	0.7858	0.47112	13107	11372	0.61479	21036
rs2227478	G	A	G	0.042991	0.28378	0.97734	0.28678	0.99561	0.99911	0.72682	13734	0.5176	0.86866	0.56715	13305	0.27313	15282	0.69454	33624	0.1841	0.74322	0.48072	11491	0.30255	0.7784	0.49687	12194	13768	0.61109	31019
rs229587	T	C	T	0.063551	0.32407	0.88037	0.26336	0.082828	0.7531	0.54807	10348	0.035707	0.6276	0.40577	0.97072	0.70262	0.86869	0.42474	17767	0.054381	0.64744	0.41671	10059	0.10339	0.61052	0.38512	0.96784	0.7	0.3313	1479
rs1805015	T	C	C	0.074766	0.125	0.21768	0.13299	0.67422	10995	0.704	17172	0.60692	11458	0.67969	19315	0.95589	0.9634	0.25804	35968	0.57533	11679	0.67518	20201	0.85475	11677	0.67367	20241	0.9964	0.26552	37391
rs2230739	T	C	C	0.054206	0.31651	0.97165	0.3073	0.68261	0.93522	0.67893	12883	0.56659	0.88161	0.57272	13571	0.96641	10153	0.5014	20558	0.54396	0.87384	0.56568	13499	0.82386	0.86564	0.54914	13646	0.94891	0.45347	19856
rs10775349	C	G	C	0.074766	0.32589	0.63461	0.28068	0.44194	0.8831	0.64416	12107	0.27231	0.78621	0.51158	12083	0.92039	10368	0.50909	21117	0.23404	0.76598	0.4946	11862	0.48012	0.75499	0.47879	11905	0.91752	0.43745	19245
rs2535611	C	T	C	0.046729	0.04955	0.58283	0.04762	0.95934	0.98211	0.4912	19636	0.88775	0.94986	0.46623	19352	0.45578	250850	0	Inf	0.81693	0.91868	0.44993	18758	0.73849	0.92131	0.45119	18813	249040	0	Inf
rs2297518	G	A	A	0.069159	0.05455	0.54512	0.08763	0.1116	16465	0.865	31342	0.1334	16244	0.84025	31403	0.29041	689170	0	Inf	0.173	15576	0.80447	30157	0.2196	15679	0.80976	3036	730590	0	Inf
rs12720463	C	G	G	0.091589	0.02273	0.8073	0.00931	0.15073	0.40756	0.12485	13305	0.15073	0.40756	0.12485	13305	NA	NA	NA	NA	0.15073	0.40756	0.12485	13305	0.15073	0.40756	0.12485	13305	NA	NA	NA
rs9282799	G	A	A	0.042991	0	NaN	0.00251	0.32889	564610	0	Inf	0.32889	564610	0	Inf	NA	NA	NA	NA	0.32889	564610	0	Inf	0.32889	564610	0	Inf	NA	NA	NA
rs8078340	G	A	A	0.078505	0.15929	0.18963	0.16579	0.71076	10822	0.71147	1646	0.98715	10038	0.62934	16012	0.18548	33084	0.41764	26208	0.69429	0.90903	0.56587	14603	0.40009	0.93399	0.5807	15022	32464	0.40805	25828
rs1799969	G	A	A	0.084112	0.26961	0.47703	0.23067	0.19918	0.78335	0.54099	11343	0.2242	0.75855	0.48599	1184	0.47827	0.69776	0.26455	18403	0.35815	0.80932	0.51609	12692	0.43785	0.77698	0.49034	12312	0.62578	0.23212	16871
rs5498	A	G	G	0.091589	0.49524	0.76897	0.4685	0.37507	0.87156	0.6431	11812	0.15168	0.69091	0.41253	11571	0.98675	0.99567	0.59675	16613	0.2093	0.75453	0.48585	11718	0.31487	0.65997	0.38296	11373	0.75831	0.40272	14279
rs373533	C	A	A	0.095327	0.29524	0.69096	0.23615	0.092955	0.7389	0.52075	10484	0.2091	0.75238	0.48291	11722	0.10129	0.49789	0.22248	11142	0.66831	0.90526	0.57471	1426	0.19038	0.82635	0.51705	13207	0.46063	0.20106	10553
rs461645	A	G	A	0.082243	0.2963	0.81088	0.23499	0.077546	0.72884	0.51448	10325	0.17782	0.73987	0.47755	11463	0.09598	0.49044	0.21804	11032	0.60108	0.8874	0.56764	13873	0.16723	0.80918	0.51025	12833	0.44898	0.19493	10341
rs17411697	G	T	T	0.052336	0.27727	0.48822	0.25441	0.569	0.90298	0.6363	12814	0.57399	0.88407	0.57542	13583	0.78205	0.88189	0.36505	21305	0.66293	0.90778	0.58789	14017	0.84651	0.89107	0.57065	13914	0.83793	0.3391	20705
rs1143634	G	A	A	0.091589	0.07009	0.43556	0.06992	0.94026	0.97591	0.51627	18448	0.89609	0.95768	0.50132	18295	0.54965	153240	0	Inf	0.85281	0.94026	0.49176	17978	0.8233	0.94331	0.49336	18036	151640	0	Inf
rs8386	C	T	T	0.046729	0.00893	0.92404	0.01256	0.32852	25164	0.31387	20175	0.32852	25164	0.31387	20175	NA	NA	NA	NA	0.32852	25164	0.31387	20175	0.32852	25164	0.31387	20175	NA	NA	NA
rs3177244	G	A	A	0.071028	0.12719	0.32955	0.11619	0.84572	0.95467	0.59922	1521	0.89231	0.96468	0.5737	16221	0.79228	0.79984	0.15619	4096	0.95553	0.98488	0.57678	16817	0.96325	0.97982	0.57299	16755	0.79623	0.1548	40955
rs187084	G	A	G	0.069159	0.49038	0.69199	0.45558	0.44917	0.88706	0.65037	12099	0.35947	0.79405	0.48227	13074	0.76529	0.92239	0.54392	15642	0.56297	0.87838	0.56595	13633	0.65712	0.79375	0.46886	13438	0.79476	0.42228	14958
rs6780995	G	A	A	0.085981	0.54955	0.17681	0.48413	0.089003	0.76063	0.55418	1044	0.057743	0.59685	0.34412	10352	0.37877	0.79866	0.4862	13119	0.40693	0.83309	0.54067	12837	0.15643	0.61302	0.34542	10879	0.56169	0.29142	10826
rs708567	C	T	T	0.095327	0.27232	0.41917	0.33065	0.049231	14047	0.99568	19819	0.017398	16889	10949	26051	0.78336	11084	0.52912	2322	0.025421	16506	1058	25749	0.052445	17532	11064	27781	14372	0.66837	30904
rs4833095	C	T	T	0.10467	0.48611	0.33959	0.45957	0.44415	0.88943	0.65884	12007	0.65363	0.89678	0.55612	14461	0.40786	0.80566	0.48515	13379	0.77439	10661	0.68818	16514	0.70109	0.95922	0.5735	16044	0.78562	0.43298	14255
rs5743611	C	G	G	0.076636	0.03571	0.69509	0.01571	0.11446	0.43968	0.16419	11774	0.11446	0.43968	0.16419	11774	NA	NA	NA	NA	0.11446	0.43968	0.16419	11774	0.11446	0.43968	0.16419	11774	NA	NA	NA
rs5743810	G	T	T	0.08972	0.08257	0.34741	0.06878	0.49836	0.82102	0.46735	14423	0.35181	0.74939	0.41197	13632	0.21788	607880	0	Inf	0.24712	0.69588	0.38074	12719	0.24795	0.70255	0.38436	12842	577090	0	Inf
rs5743809	A	G	G	0.084112	0	NaN	0.00131	0.51147	187900	0	Inf	0.51147	187900	0	Inf	NA	NA	NA	NA	0.51147	187900	0	Inf	0.51147	187900	0	Inf	NA	NA	NA
rs2706384	G	T	G	0.11215	0.395	0.55869	0.39733	0.60941	10908	0.78101	15235	0.4194	12112	0.76211	1925	0.90208	0.96099	0.51064	18085	0.38777	12192	0.77721	19124	0.66756	1.25	0.76571	20407	10913	0.54823	21725
rs20541	G	A	G	0.24486	0.40123	0.06704	0.38235	0.96901	1007	0.7088	14306	0.48884	11988	0.71826	20009	0.42176	0.76874	0.40832	14473	0.19205	14036	0.84006	23451	0.40902	13574	0.77452	23788	0.90117	0.45081	18015
rs2243250	C	T	C	0.08785	0.40179	0.45044	0.42686	0.46501	11187	0.8274	15125	0.49256	1.17	0.74837	1829	0.61624	11527	0.65812	2019	0.78975	10607	0.6877	1636	0.76128	11419	0.7074	18432	12412	0.66826	23054
rs1801033	T	G	T	0.074766	0.42411	0.74084	0.42559	0.96426	10072	0.73679	13768	0.66772	11048	0.70174	17394	0.65101	0.87807	0.50183	15364	0.45545	11778	0.76615	18106	0.75079	11614	0.71729	18804	0.96007	0.5129	17971
rs1555498	C	T	C	0.057944	0.06132	0.50122	0.0691	0.48018	12639	0.6514	24524	0.51581	12456	0.63516	24427	0.48678	213790	0	Inf	0.56111	12177	0.62048	23899	0.65865	12225	0.62287	23995	220720	0	Inf
rs2239704	C	A	A	0.074766	0.27315	0.64794	0.26357	0.9832	0.99612	0.69371	14304	0.65543	11041	0.71442	17063	0.32066	0.63766	0.26882	15126	0.35234	12335	0.791	19237	0.46612	11858	0.75182	18703	0.68724	0.28348	16661
rs909253	A	G	A	0.08785	0.48077	0.0513	0.46484	0.8317	0.96774	0.7152	13095	0.59014	1.14	0.70909	18328	0.34797	0.78389	0.47369	12972	0.1911	13453	0.86037	21036	0.40561	1291	0.76804	21701	0.91171	0.50767	16373
rs1799964	T	C	C	0.059813	0.18349	0.0056325	0.17259	0.7027	0.92988	0.64132	13483	0.847	10472	0.65489	16745	0.17292	0.52913	0.21858	12809	0.35955	12652	0.7601	21061	0.30172	12107	0.72318	20269	0.55633	0.22764	13596
rs1800750	G	A	A	0.082243	0.07965	1.2e-11	0.02249	0.0032126	0.3928	0.21307	0.72413	0.01796	0.3605	0.15942	0.81518	0.002567	0.086314	0.015759	0.47277	0.38332	0.63491	0.23513	17144	0.0067227	0.60638	0.22405	16411	0.084395	0.015394	0.4627
rs1800629	G	A	A	0.063551	0.04425	0.083217	0.03222	0.5938	0.8073	0.37187	17526	0.79336	0.89334	0.38673	20636	0.11688	5.23e-07	0	Inf	0.96397	10204	0.42433	24538	0.29238	10123	0.42104	24337	5.24e-07	0	Inf
rs361525	G	A	A	0.035514	0.04825	0.13401	0.04726	0.84928	0.93545	0.47186	18545	0.97962	10097	0.48203	21149	0.32684	0.22676	0.012868	3996	0.79459	11067	0.51267	23892	0.60037	10994	0.50909	2374	0.2283	0.012942	40273
rs3093662	A	G	G	0.057944	0.05909	0.0055867	0.06345	0.46155	12825	0.65138	2525	0.32338	14232	0.69182	29279	0.31284	0.21174	0.011427	39235	0.22002	15711	0.74128	3.33	0.29022	15604	0.73595	33083	0.21981	0.011792	40975
rs2242665	C	T	T	0.063551	0.42105	0.1454	0.37209	0.41993	0.88461	0.65707	11909	0.67444	0.91011	0.58594	14136	0.32716	0.75807	0.43884	13095	0.7352	10772	0.69985	16579	0.61737	0.98388	0.61152	1583	0.75154	0.41138	1373
rs17140229	T	C	C	0.074766	0.02632	0.77291	0.02756	0.60133	13003	0.47465	3562	0.60133	13003	0.47465	3562	NA	NA	NA	NA	0.60133	13003	0.47465	3562	0.60133	13003	0.47465	3562	NA	NA	NA
rs2075820	C	T	T	0.065421	0.09565	0.25669	0.09481	0.92748	0.97618	0.58137	16391	0.71657	0.90258	0.52054	1565	0.14242	1778000	0	Inf	0.52322	0.83339	0.47869	14509	0.28585	0.84407	0.48475	14697	1727700	0	Inf
rs3211938	T	G	G	0.052336	0.05	0.00053503	0.01511	0.0061526	0.32011	0.14409	0.71115	0.021344	0.3329	0.13528	0.81925	0.0074724	9.18e-08	0	Inf	0.11975	0.45069	0.1716	11837	0.0078852	0.44183	0.16796	11623	8.88e-08	0	Inf
hCD36_G1439C	G	C	NA	0.069159	0	NaN	0	NA	NA	NA	NA	NA	NA	NA	NA	NA	NA	NA	NA	NA	NA	NA	NA	NA	NA	NA	NA	NA	NA	NA
rs4986790	A	G	G	0.10467	0.01415	0.88251	0.01475	0.95434	1036	0.3072	3494	0.9015	0.91882	0.24253	34809	0.42391	294980	0	Inf	0.74706	0.79774	0.20666	30794	0.69105	0.80163	0.20763	30949	292640	0	Inf
rs4986791	C	T	T	0.033645	0.01327	0.88629	0.01361	0.94247	10452	0.31281	34922	0.92373	0.93751	0.25196	34884	0.43726	275640	0	Inf	0.77889	0.82404	0.21784	31171	0.71184	0.82662	0.21849	31274	274330	0	Inf
rs8176746	G	T	T	0.080374	0.04018	0.65776	0.02368	0.22837	0.60176	0.26987	13418	0.17244	0.54586	0.23488	12686	0.49292	207010	0	Inf	0.1388	0.51473	0.21964	12063	0.26666	0.51619	0.22028	12096	198290	0	Inf
Malaria: clinical malaria and previous malaria ; asym: asymptomatic infection; missingness: number of individuals with failed genotyping; alefreq: allele frequency; add: aditive model; OR: odds ratio; 95% Confidence interval (LCL, UCL); dom: dominant model; p: P-value; rec: recessive model; Het: heteroygous; gen: general model.
